# Supplementary material for: Phenolic compounds profiling of nine dogwood species (Cornus L.) leaves
Source: PeerJ journal article supplement (doi:10.7717/peerj.19457), 2025-06-09
Supplement: Raw_data.xlsx [file Raw_data.xlsx]

## Sheet: Hárok1
	Gallic acid		Chlorogenic acid		Ellagic acid			Quercetin-3-O-rutinoside		Quercetin-3-O-galactoside		Quercetin-3-O-glucuronide		Quercetin-3-O-glucoside		Quercetin-3-O-rhamnoside			Kaempherol-3-galaktoside		Kaempherol-3-O-rutinoside		Kaempferol-3-O-glukoside			Quercetin		Kaempherol
	Pik area	mg/g	Pik area	mg/g	Pik area	mg/g		Pik area	mg/g	Pik area	mg/g	Pik area	mg/g	Pik area	mg/g	Pik area	mg/g		Pik area	mg/g	Pik area	mg/g	Pik area	mg/g		Pik area	mg/g	Pik area	mg/g
Cornus officinalis 1	115.3	0.24367	7368.9	18.8139	435.6	0.461441		52.9	0.399336	1083.3	4.50437	3190	7.35327	196.6	1.54654	0	0		74.6	0.166473	0	0	240.2	0.396148		2144.9	2.06796	248.5	0.127099
Cornus officinalis 2	136.9	0.289319	7929.3	20.2447	501.7	0.531462		55.2	0.416698	1102.2	4.58295	3384.6	7.80184	208.1	1.637	0	0		74.8	0.16692	0	0	251.8	0.415279		2857.2	2.75472	154.8	0.0791746
Cornus officinalis 3	120.8	0.255294	6223.7	15.8901	416.2	0.44089		45.7	0.344984	881	3.6632	2511.6	5.78949	163.9	1.28931	0	0		59.6	0.133	0	0	205	0.338095		2257.6	2.17662	127.7	0.0653139
Cornus florida 1	180.2	0.380828	1627.9	4.15628	166.2	0.176059		0	0	206.1	0.856965	0	0	560.5	4.40913	0	0		0	0	0	0	452.7	0.746612		613.7	5.90835	491.9	0.251589
Cornus florida 2	175.3	0.370472	1365.5	3.48633	138.6	0.146822		0	0	157.1	0.653222	0	0	485.1	3.816	0	0		0	0	0	0	352.6	0.581523		555.6	5.34899	398	0.203563
Cornus florida 3	150.1	0.317215	1467.2	3.74599	284.3	0.301165		0	0	53.7	0.223285	0	0	432.9	3.40537	0	0		0	0	0	0	338.4	0.558104		552.2	5.31626	440.8	0.225453
Cornus racemosa 1	183.3	0.387379	1462.6	3.73424	0	0		114.5	0.864347	7198.6	29.9318	0	0	1225.1	9.63714	5383.4	8.25986		0	0	250.5	0.538999	0	0		7100.4	68.3585	71.3	0.0364674
Cornus racemosa 2	189.8	0.401116	1377.4	3.51671	0	0		109.5	0.826602	6874.8	28.5854	0	0	1164	9.15651	5068.5	7.7767		0	0	262.5	0.56482	0	0		6367	61.2978	64.7	0.0330917
Cornus racemosa 3	177.5	0.375122	1195.6	3.05255	98.32	0.104153		100.2	0.756398	6118.2	25.4395	0	0	1048.4	8.24715	4653.3	7.13965		0	0	239.3	0.5149	0	0		5731	55.1747	54.4	0.0278236
Cornus alba 1	490.6	1.03681	1216.4	3.10566	600.3	0.635911		40.2	0.303465	1151.8	4.78919	738.2	1.70162	172	1.35302	0	0		0	0	0	0	0	0		1091.7	10.5103	163.8	0.0837777
Cornus alba 2	429	0.906632	1087.1	2.77553	543.3	0.57553		35.8	0.27025	1037	4.31185	662.1	1.52621	164	1.29009	0	0		0	0	0	0	0	0		1204.4	11.5953	152.047	0.0777665
Cornus alba 3	434.3	0.917833	937.4	2.39333	787.2	0.833898		33.9	0.255907	889.1	3.69688	561.5	1.29431	143	1.1249	0	0		0	0	0	0	0	0		1193.8	11.4932	142.385	0.0728247
																	0
Cornus mas 1	289.6	0.612029	7626.9	19.4726	532.6	0.564195		43.2	0.326112	146.9	0.610811	2669.7	6.15393	0	0	0	0		0	0	0	0	440.8	0.726986		2345.1	22.5773	222.6	0.113852
Cornus mas 2	302.5	0.639292	7584.5	19.3644	526.1	0.557309		43.2	0.326112	178.1	0.740541	2857.6	6.58705	0	0	0	0		0	0	0	0	440.1	0.725832		1910.9	18.397	236.6	0.121012
Cornus mas 3	259.6	0.548628	6425.25	16.4046	432.8	0.458475		38.2	0.288367	125.7	0.522661	2107.5	4.858	0	0	0	0		0	0	0	0	342.5	0.564865		1576.4	15.1767	185.2	0.0947231
Cornus seriaceae var.baileyi 1	285.1	0.602519	187.3	0.478206	1610.7	1.70625		181	1.36635	1249	5.19335	1450.1	3.34263	444.1	3.49347	0	0		0	0		0	133.8	0.220669		2760.3	26.5746	154	0.0787654
Cornus seriaceae var.baileyi 2	254.5	0.53785	165.6	0.422802	796.4	0.843644		149.1	1.12554	1018	4.23285	1230.7	2.83689	352.1	2.76976	0	0		0	0		0	114.4	0.188673		2376.8	22.8824	169.8	0.0868465
Cornus seriaceae var.baileyi 3	257.7	0.544613	150.2	0.383484	916.5	0.970869		141.6	1.06892	899.4	3.73971	1103.4	2.54345	321	2.52512	0	0		0	0		0	108.1	0.178283		2244.4	21.6078	162.7	0.0832151
Cornus amomum 1	215.3	0.455007	926.8	2.36626	191.8	0.203178		53.5	0.403865	885.3	3.68108	0	0	560.2	4.40677	3150	4.83311		0	0	0	0	0	0		3183	30.6441	159.7	0.0816807
Cornus amomum 2	229.9	0.485862	919.5	2.34762	183.446	0.194328		46.4	0.350268	848.6	3.52848	0	0	547.8	4.30922	3088.3	4.73844		0	0	0	0	0	0		3194.5	30.7548	155.1	0.079328
Cornus amomum 3	229.5	0.485016	819.4	2.09205	169.8	0.179873		44.8	0.33819	675	2.80665	0	0	470.4	3.70036	2403.8	3.6882		0	0	0	0	0	0		3503.4	33.7287	200	0.102293
Cornus coreana 1	736.2	1.55586	0	0	743.6	0.787712		622.2	4.69691	702.3	2.92017	1938.6	4.46867	847.1	6.66364	0	0		159	0.354816	631.7	1.35923	2376.2	3.91893		2295.3	22.0978	1755.1	0.89767
Cornus coreana 2	801	1.6928	0	0	715.1	0.757521		496.8	3.75028	705	2.93139	1568.2	3.61486	794.2	6.24751	0	0		157	0.350353	640.4	1.37795	2386.9	3.93658		2225.8	21.4287	1615.4	0.826218
Cornus coreana 3	770.6	1.62856	0	0	519.2	0.55		543	4.09904	639.6	2.65946	1629.7	3.75662	750.5	5.90374	0	0		150.8	0.336517	554.1	1.19225	2036.5	3.35868		2389.1	23.0009	1974.6	1.00994
Cornus kousa 1	160.8	0.339828	2519	6.43139	811.3	0.859428		129.4	0.976825	1159	4.81913	0	0	1287.9	10.1312	0	0		0	0	0	0	69.5	0.114622		2634	25.3586	157.1	0.0803509
Cornus kousa 2	148.2	0.3132	2835	7.23819	869.2	0.920763		112.5	0.849249	694.2	2.88649	0	0	1251.1	9.84167	0	0		0	0	0	0	58.1	0.095821		1765.3	16.9953	99.2	0.0507372
Cornus kousa 3	177.2	0.374488	3060.7	7.81444	733.9	0.777436		186.7	1.40938	1185	4.92723	0	0	1536.1	12.0836	0	0		0	0	0	0	80.4	0.132599		2599.1	25.0226	141.3	0.0722698
