# Supplementary material for: Phenolic compounds profiling of nine dogwood species (Cornus L.) leaves
Source: PeerJ journal article supplement (doi:10.7717/peerj.19457), 2025-06-09
Supplement: Supplement_1.docx [file Supplement_1.docx]

| Species | GPS-coordinates | Voucher codes |
| --- | --- | --- |
| *C. alba* L. (A) | 48.319249 N; 18.367594 E | CA_23 |
| *C. amomum* Mill. (B) | 48.321432 N; 18.371227 E | CAm_23 |
| *Cornus sericea* var. *baileyi* (J.M.Coult. & W.H.Evans) Mohlenbr.(C) | 48.321012 N; 18.372764 E | CSB_23 |
| *C. coreana* Wangerin (D) | 48.319249 N; 18.367594 E | CC_23 |
| *C. florida* L. (E) | 48.320944 N; 18.372327 E | CF_23 |
| *C. kousa* Bürger ex Hance (F) | 48.319690 N; 18.365627 E | CK_23 |
| *C. mas* L. (G) | 48.322085 N; 18.364454 E | CM_23 |
| *C. officinalis* Siebold & Zucc.(H) | 48.321212 N; 18.366888 E | CO_23 |
| *C. racemosa* Lam. (I) | 48.321003 N; 18.372822 E | CR_23 |

**Supplement table 1. GPS coordinates for *Cornus* L.mother plant locations**
